# Supplementary material
Source: Research Square preprint supplement (doi:10.21203/rs.3.rs-9782189/v1)
Supplement: Supplementary file 1 [file 495f9d9072713f9a6c4474da.xlsx]

## Sheet: Sheet1
Table S4. GO Enrichment Analysis of BnaNPRs
ONTOLOGY	ID	Description	GeneRatio	BgRatio	pvalue	p.adjust	geneID	Count
BP	GO:2000022	regulation of jasmonic acid mediated signaling pathway	11/11	192/65015	1.11376254664072e-28	1.89339632928922e-27	BnaC09g12000D/BnaC08g12110D/BnaC01g18080D/BnaA09g11550D/BnaA08g14450D/BnaA01g15290D/BnaC07g02890D/BnaC02g31190D/BnaA02g23720D/BnaC01g12020D/BnaA01g10220D	11
BP	GO:0009627	systemic acquired resistance	11/11	286/65015	9.8329800451449e-27	8.35803303837316e-26	BnaC09g12000D/BnaC08g12110D/BnaC01g18080D/BnaA09g11550D/BnaA08g14450D/BnaA01g15290D/BnaC07g02890D/BnaC02g31190D/BnaA02g23720D/BnaC01g12020D/BnaA01g10220D	11
BP	GO:0009867	jasmonic acid mediated signaling pathway	11/11	481/65015	3.2418225028535e-24	1.83703275161698e-23	BnaC09g12000D/BnaC08g12110D/BnaC01g18080D/BnaA09g11550D/BnaA08g14450D/BnaA01g15290D/BnaC07g02890D/BnaC02g31190D/BnaA02g23720D/BnaC01g12020D/BnaA01g10220D	11
BP	GO:0071395	cellular response to jasmonic acid stimulus	11/11	498/65015	4.76909540354089e-24	2.02686554650488e-23	BnaC09g12000D/BnaC08g12110D/BnaC01g18080D/BnaA09g11550D/BnaA08g14450D/BnaA01g15290D/BnaC07g02890D/BnaC02g31190D/BnaA02g23720D/BnaC01g12020D/BnaA01g10220D	11
BP	GO:2000031	regulation of salicylic acid mediated signaling pathway	8/11	95/65015	2.52516881842176e-21	8.585573982634e-21	BnaC09g12000D/BnaC08g12110D/BnaC01g18080D/BnaA09g11550D/BnaA08g14450D/BnaA01g15290D/BnaC01g12020D/BnaA01g10220D	8
BP	GO:2001023	regulation of response to drug	8/11	105/65015	5.78996458464854e-21	1.40613425627179e-20	BnaC09g12000D/BnaC08g12110D/BnaC01g18080D/BnaA09g11550D/BnaA08g14450D/BnaA01g15290D/BnaC01g12020D/BnaA01g10220D	8
BP	GO:2001038	regulation of cellular response to drug	8/11	105/65015	5.78996458464854e-21	1.40613425627179e-20	BnaC09g12000D/BnaC08g12110D/BnaC01g18080D/BnaA09g11550D/BnaA08g14450D/BnaA01g15290D/BnaC01g12020D/BnaA01g10220D	8
BP	GO:0009863	salicylic acid mediated signaling pathway	8/11	208/65015	1.56791668555633e-18	3.3318229568072e-18	BnaC09g12000D/BnaC08g12110D/BnaC01g18080D/BnaA09g11550D/BnaA08g14450D/BnaA01g15290D/BnaC01g12020D/BnaA01g10220D	8
BP	GO:0071446	cellular response to salicylic acid stimulus	8/11	232/65015	3.8061048470951e-18	7.18930915562408e-18	BnaC09g12000D/BnaC08g12110D/BnaC01g18080D/BnaA09g11550D/BnaA08g14450D/BnaA01g15290D/BnaC01g12020D/BnaA01g10220D	8
BP	GO:0071236	cellular response to antibiotic	8/11	291/65015	2.38508339854218e-17	4.0546417775217e-17	BnaC09g12000D/BnaC08g12110D/BnaC01g18080D/BnaA09g11550D/BnaA08g14450D/BnaA01g15290D/BnaC01g12020D/BnaA01g10220D	8
BP	GO:0009862	systemic acquired resistance, salicylic acid mediated signaling pathway	6/11	56/65015	1.42568187487846e-16	2.20332653390307e-16	BnaC09g12000D/BnaC08g12110D/BnaC01g18080D/BnaA09g11550D/BnaA08g14450D/BnaA01g15290D	6
BP	GO:0010112	regulation of systemic acquired resistance	6/11	70/65015	5.75195900602924e-16	8.14860859187476e-16	BnaC09g12000D/BnaC08g12110D/BnaC01g18080D/BnaA09g11550D/BnaA08g14450D/BnaA01g15290D	6
BP	GO:0009682	induced systemic resistance	6/11	134/65015	3.13565173610123e-14	4.10046765490161e-14	BnaC09g12000D/BnaC08g12110D/BnaC01g18080D/BnaA09g11550D/BnaA08g14450D/BnaA01g15290D	6
BP	GO:0009625	response to insect	6/11	212/65015	5.10238105033706e-13	6.19574841826643e-13	BnaC09g12000D/BnaC08g12110D/BnaC01g18080D/BnaA09g11550D/BnaA08g14450D/BnaA01g15290D	6
BP	GO:0031348	negative regulation of defense response	6/11	325/65015	6.73986848598085e-12	7.63851761744497e-12	BnaC09g12000D/BnaC08g12110D/BnaC01g18080D/BnaA09g11550D/BnaA08g14450D/BnaA01g15290D	6
BP	GO:0002831	regulation of response to biotic stimulus	6/11	396/65015	2.213665200726e-11	2.35201927577137e-11	BnaC09g12000D/BnaC08g12110D/BnaC01g18080D/BnaA09g11550D/BnaA08g14450D/BnaA01g15290D	6
BP	GO:0032101	regulation of response to external stimulus	6/11	418/65015	3.06365075306588e-11	3.06365075306588e-11	BnaC09g12000D/BnaC08g12110D/BnaC01g18080D/BnaA09g11550D/BnaA08g14450D/BnaA01g15290D	6
MF	GO:0033293	monocarboxylic acid binding	5/11	124/63942	1.15714471562274e-11	3.69623300062621e-11	BnaC07g02890D/BnaC02g31190D/BnaA02g23720D/BnaC01g12020D/BnaA01g10220D	5
MF	GO:0042562	hormone binding	5/11	136/63942	1.8481165003131e-11	3.69623300062621e-11	BnaC07g02890D/BnaC02g31190D/BnaA02g23720D/BnaC01g12020D/BnaA01g10220D	5
MF	GO:0031406	carboxylic acid binding	5/11	223/63942	2.24017828207039e-10	2.24017828207039e-10	BnaC07g02890D/BnaC02g31190D/BnaA02g23720D/BnaC01g12020D/BnaA01g10220D	5
MF	GO:0043177	organic acid binding	5/11	223/63942	2.24017828207039e-10	2.24017828207039e-10	BnaC07g02890D/BnaC02g31190D/BnaA02g23720D/BnaC01g12020D/BnaA01g10220D	5
