# Supplementary material
Source: Research Square preprint supplement (doi:10.21203/rs.3.rs-9782189/v1)
Supplement: Supplementary file 2 [file 49cc366194ae3f556f4b9f5d.xlsx]

## Sheet: Sheet1
Table S5. GO Enrichment Analysis of AtNPR3 co‑expression genes
ONTOLOGY	GO Terms	P-value
Biological Process	systemic acquired resistance, salicylic acid mediated signaling pathway (GO:0009862)	0.000218
Biological Process	regulation of salicylic acid biosynthetic process (GO:0080142)	0.0366
Biological Process	regulation of salicylic acid metabolic process (GO:0010337)	0.000297
Biological Process	lipid translocation (GO:0034204)	0.0494
Biological Process	defense response to Gram-negative bacterium (GO:0050829)	0.0097
Biological Process	salicylic acid mediated signaling pathway (GO:0009863)	1.35e-07
Biological Process	cellular response to salicylic acid stimulus (GO:0071446)	3.17e-08
Biological Process	regulation of systemic acquired resistance (GO:0010112)	0.019
Biological Process	regulation of salicylic acid mediated signaling pathway (GO:2000031)	0.0027
Biological Process	cellular response to hypoxia (GO:0071456)	7.06e-39
Biological Process	cellular response to decreased oxygen levels (GO:0036294)	1.05e-38
Biological Process	cellular response to oxygen levels (GO:0071453)	1.28e-38
Biological Process	regulation of brassinosteroid mediated signaling pathway (GO:1900457)	0.0284
Biological Process	response to hypoxia (GO:0001666)	7e-42
Biological Process	response to oxygen levels (GO:0070482)	2.37e-42
Biological Process	response to decreased oxygen levels (GO:0036293)	2.19e-41
Biological Process	regulation of jasmonic acid mediated signaling pathway (GO:2000022)	0.000806
Biological Process	positive regulation of defense response to bacterium (GO:1900426)	0.0489
Biological Process	regulation of defense response to bacterium (GO:1900424)	3.18e-05
Biological Process	plant-type hypersensitive response (GO:0009626)	7.66e-10
Biological Process	symbiont-induced defense-related programmed cell death (GO:0034050)	8.75e-10
Biological Process	response to molecule of bacterial origin (GO:0002237)	0.00494
Biological Process	negative regulation of defense response (GO:0031348)	3.41e-05
Biological Process	response to salicylic acid (GO:0009751)	4.27e-13
Biological Process	systemic acquired resistance (GO:0009627)	0.00343
Biological Process	regulation of ketone metabolic process (GO:0010565)	0.027
Biological Process	positive regulation of defense response (GO:0031349)	5.25e-06
Biological Process	regulation of defense response (GO:0031347)	2.7e-19
Biological Process	defense response to bacterium (GO:0042742)	4.08e-23
Biological Process	programmed cell death (GO:0012501)	1.48e-07
Biological Process	cell death (GO:0008219)	1.62e-07
Biological Process	positive regulation of response to biotic stimulus (GO:0002833)	0.000195
Biological Process	positive regulation of response to external stimulus (GO:0032103)	0.000195
Biological Process	response to bacterium (GO:0009617)	3.63e-30
Biological Process	regulation of response to biotic stimulus (GO:0002831)	2.74e-11
Biological Process	regulation of response to external stimulus (GO:0032101)	2.74e-11
Biological Process	innate immune response (GO:0045087)	1.62e-11
Biological Process	immune response (GO:0006955)	2.89e-11
Biological Process	regulation of immune response (GO:0050776)	0.00032
Biological Process	regulation of immune system process (GO:0002682)	0.00032
Biological Process	regulation of intracellular signal transduction (GO:1902531)	0.0474
Biological Process	defense response to symbiont (GO:0140546)	1.55e-11
Biological Process	regulation of response to stress (GO:0080134)	1.24e-17
Biological Process	immune system process (GO:0002376)	9.32e-12
Biological Process	regulation of innate immune response (GO:0045088)	0.00974
Biological Process	defense response to other organism (GO:0098542)	2.14e-14
Biological Process	positive regulation of response to stimulus (GO:0048584)	5.03e-06
Biological Process	ethylene-activated signaling pathway (GO:0009873)	0.00526
Biological Process	negative regulation of response to stimulus (GO:0048585)	0.000431
Biological Process	cellular response to ethylene stimulus (GO:0071369)	0.00797
Biological Process	defense response (GO:0006952)	4.85e-45
Biological Process	response to wounding (GO:0009611)	0.000248
Biological Process	regulation of signal transduction (GO:0009966)	2.06e-07
Biological Process	regulation of response to stimulus (GO:0048583)	2.99e-20
Biological Process	regulation of signaling (GO:0023051)	2.62e-07
Biological Process	regulation of cell communication (GO:0010646)	2.74e-07
Biological Process	response to external biotic stimulus (GO:0043207)	1.19e-33
Biological Process	response to other organism (GO:0051707)	1.19e-33
Biological Process	response to biotic stimulus (GO:0009607)	1.37e-33
Biological Process	biological process involved in interspecies interaction between organisms (GO:0044419)	2.37e-33
Biological Process	cellular response to stress (GO:0033554)	8.15e-24
Biological Process	response to external stimulus (GO:0009605)	4.06e-32
Biological Process	cellular response to chemical stimulus (GO:0070887)	2.14e-23
Biological Process	response to fungus (GO:0009620)	1.61e-06
Biological Process	defense response to fungus (GO:0050832)	0.000824
Biological Process	response to oxidative stress (GO:0006979)	0.0193
Biological Process	response to osmotic stress (GO:0006970)	0.00197
Biological Process	response to stress (GO:0006950)	1.97e-47
Biological Process	response to abiotic stimulus (GO:0009628)	5.12e-19
Biological Process	cellular response to oxygen-containing compound (GO:1901701)	0.000755
Biological Process	response to oxygen-containing compound (GO:1901700)	1.34e-11
Biological Process	intracellular signal transduction (GO:0035556)	0.00698
Biological Process	cellular response to stimulus (GO:0051716)	1.83e-27
Biological Process	response to chemical (GO:0042221)	1.15e-22
Biological Process	signal transduction (GO:0007165)	8.62e-12
Biological Process	signaling (GO:0023052)	1.99e-11
Biological Process	cell communication (GO:0007154)	3.88e-11
Biological Process	hormone-mediated signaling pathway (GO:0009755)	0.0229
Biological Process	positive regulation of biological process (GO:0048518)	0.00589
Biological Process	negative regulation of biological process (GO:0048519)	0.0133
Biological Process	response to stimulus (GO:0050896)	1.04e-32
Biological Process	response to hormone (GO:0009725)	0.00308
Biological Process	response to endogenous stimulus (GO:0009719)	0.00489
Biological Process	regulation of biological process (GO:0050789)	5.7e-16
Biological Process	regulation of cellular process (GO:0050794)	6.74e-13
Biological Process	biological regulation (GO:0065007)	1.14e-15
Biological Process	regulation of RNA biosynthetic process (GO:2001141)	0.0196
Biological Process	regulation of DNA-templated transcription (GO:0006355)	0.0196
Biological Process	regulation of RNA metabolic process (GO:0051252)	0.0493
Biological Process	cellular process (GO:0009987)	0.0426
Biological Process	Unclassified (UNCLASSIFIED)	0
Biological Process	macromolecule biosynthetic process (GO:0009059)	6.41e-05
Biological Process	nucleobase-containing compound metabolic process (GO:0006139)	2.15e-05
Biological Process	nucleobase-containing compound biosynthetic process (GO:0034654)	0.0098
Biological Process	nucleic acid metabolic process (GO:0090304)	4.35e-05
Biological Process	RNA metabolic process (GO:0016070)	0.00076
Biological Process	gene expression (GO:0010467)	1.17e-06
Molecular Function	ADP binding (GO:0043531)	2.1e-07
Molecular Function	calmodulin binding (GO:0005516)	1.2e-05
Molecular Function	calcium ion binding (GO:0005509)	0.00356
Molecular Function	protein serine kinase activity (GO:0106310)	4.24e-05
Molecular Function	protein kinase activity (GO:0004672)	7.52e-08
Molecular Function	protein serine/threonine kinase activity (GO:0004674)	8.52e-06
Molecular Function	phosphotransferase activity, alcohol group as acceptor (GO:0016773)	1.06e-06
Molecular Function	kinase activity (GO:0016301)	6.93e-07
Molecular Function	transcription regulatory region nucleic acid binding (GO:0001067)	0.000267
Molecular Function	transcription cis-regulatory region binding (GO:0000976)	0.000267
Molecular Function	sequence-specific DNA binding (GO:0043565)	1.44e-05
Molecular Function	sequence-specific double-stranded DNA binding (GO:1990837)	0.000404
Molecular Function	double-stranded DNA binding (GO:0003690)	0.00193
Molecular Function	transferase activity, transferring phosphorus-containing groups (GO:0016772)	3.97e-05
Molecular Function	adenyl ribonucleotide binding (GO:0032559)	2.13e-09
Molecular Function	adenyl nucleotide binding (GO:0030554)	8.73e-09
Molecular Function	DNA-binding transcription factor activity (GO:0003700)	0.000359
Molecular Function	purine ribonucleotide binding (GO:0032555)	6.83e-08
Molecular Function	ribonucleotide binding (GO:0032553)	9.85e-08
Molecular Function	carbohydrate derivative binding (GO:0097367)	2.23e-07
Molecular Function	purine nucleotide binding (GO:0017076)	2e-07
Molecular Function	transcription regulator activity (GO:0140110)	0.00124
Molecular Function	anion binding (GO:0043168)	7.89e-08
Molecular Function	nucleotide binding (GO:0000166)	3.92e-07
Molecular Function	nucleoside phosphate binding (GO:1901265)	4.03e-07
Molecular Function	ATP binding (GO:0005524)	0.000195
Molecular Function	heterocyclic compound binding (GO:1901363)	8.96e-07
Molecular Function	catalytic activity, acting on a protein (GO:0140096)	2.3e-05
Molecular Function	protein binding (GO:0005515)	2.38e-13
Molecular Function	purine ribonucleoside triphosphate binding (GO:0035639)	0.00239
Molecular Function	transferase activity (GO:0016740)	0.000158
Molecular Function	ion binding (GO:0043167)	1.41e-07
Molecular Function	small molecule binding (GO:0036094)	2.82e-07
Molecular Function	binding (GO:0005488)	3.71e-13
Molecular Function	Unclassified (UNCLASSIFIED)	0
Molecular Function	RNA binding (GO:0003723)	0.000689
Cellular Component	EDS1 disease-resistance complex (GO:0106093)	0.00349
Cellular Component	plasma membrane (GO:0005886)	3.79e-09
Cellular Component	cell periphery (GO:0071944)	9.81e-07
Cellular Component	membrane (GO:0016020)	3.73e-06
Cellular Component	nucleus (GO:0005634)	0.00116
Cellular Component	Unclassified (UNCLASSIFIED)	0
Cellular Component	intracellular membraneless organelle (GO:0043232)	0.0118
Cellular Component	membraneless organelle (GO:0043228)	0.0118
