# Supplementary material
Source: Research Square preprint supplement (doi:10.21203/rs.3.rs-9782189/v1)
Supplement: Supplementary file 3 [file 860fefe1e0955957713bb79e.xlsx]

## Sheet: Sheet1
Table S2. Physicochemical parameters and subcellular localization of NPR genes in Brassica spp.
Species	Gene ID	Name	Chromosome lacation	Strand	Number of Amino Acid	Molecular Weight	pI	Instability Index	Subcellular localization
A. thaliana	AT1G64280.1	AtNPR1	23852748-23855658	-	593	66031.9	5.72	41.34	Nuclear
A. thaliana	AT4G26120.2	AtNPR2	13236253-13238818	+	601	68137.5	5.9	42.62	Chloroplasts
A. thaliana	AT5G45110.1	AtNPR3	18228768-18231578	+	586	66060.7	6.13	43	Chloroplasts
A. thaliana	AT4G19660.2	AtNPR4	10696266-10698792	-	601	68221.1	6.43	50.14	Nuclear
B.napus	BnaA01g15290D	BnaNPR1.A01	7812716-7815642	+	608	67709.2	5.87	44.33	Cytoplasm
B.napus	BnaA08g14450D	BnaNPR1.A08	12236771-12243472	-	842	95400.6	4.59	48.19	Cytoplasm
B.napus	BnaA09g11550D	BnaNPR1.A09	5904799-5907116	-	569	63305.8	5.87	46.63	Nuclear
B.napus	BnaC01g18080D	BnaNPR1.C01	1258742-12590191	+	606	67328.8	5.71	42.03	Cytoplasm
B.napus	BnaC08g12110D	BnaNPR1.C08	17348712-17350840	+	596	66203.6	5.17	53.89	Cytoplasm and nucleus
B.napus	BnaC09g12000D	BnaNPR1.C09	8332083-8334774	-	570	63328.6	5.72	45.12	Nuclear
B.napus	BnaA01g15310D	BnaNPR2.A01	782990-7832460	+	605	67945.2	6.11	45.03	Chloroplasts
B.napus	BnaC01g18130D	BnaNPR2.C01	12619106-12621768	+	605	67994.1	5.93	45.88	Cytoplasm
B.napus	BnaA02g23720D	BnaNPR3.A02	17011164-17013065	+	562	63527.9	6.5	51.77	Chloroplasts
B.napus	BnaC02g31190D	BnaNPR3.C02	33289535-33292443	-	509	57376.2	5.93	50.5	Cytoplasm
B.napus	BnaC07g02890D	BnaNPR3.C07	3664882-3667454	-	542	60788.8	8.07	49.58	Nuclear
B.napus	BnaA01g10220D	BnaNPR4.A01	5074643-5077217	-	588	66271.6	6.08	46.93	Nuclear
B.napus	BnaC01g12020D	BnaNPR4.C01	7581317-7583818	-	588	66270.4	6.03	44.46	Nuclear
B. oleracea	BolC1t02112H	BolNPR1.C01	14291772-14294246	+	606	67627.3	5.91	43.01	Plasma Membrane
B. oleracea	BolC8t48653H	BolNPR1.C08	24087091-24093958	+	1022	114714	4.7	49.85	Cytoplasm
B. oleracea	BolC9t54613H	BolNPR1.C09	11638715-11641062	-	570	63328.6	5.72	45.12	Nuclear
B. oleracea	BolC1t02118H	BolNPR2.C01	14324420-14326845	+	605	67994.1	5.93	45.88	Cytoplasm
B. oleracea	BolC2t10649H	BolNPR3.C02	46255098-46256682	+	434	48910.5	5.17	54.65	Chloroplasts
B. oleracea	BolC7t43323H	BolNPR3.C07	35404501-35406466	+	578	64766.2	6.66	49.04	Nuclear
B. oleracea	BolC1t01341H	BolNPR4.C01	8248742-8250752	-	588	66270.4	6.03	44.46	Nuclear
B. rapa	BraA01g016840.3C	BraNPR1.A01	8951147-8953510	+	579	64533.5	6	45.24	Cytoplasm
B. rapa	BraA08g019880.3C	BraNPR1.A08	15308702-15311572	-	668	74408	5.17	53.79	Cytoplasm
B. rapa	BraA09g013710.3C	BraNPR1.A09	7995864-7998026	-	571	63494.9	6.03	44.06	Nuclear
B. rapa	BraA01g016870.3C	BraNPR2.A01	8966953-8969269	+	605	67873.1	5.92	44.56	Chloroplasts
B. rapa	BraA02g031580.3C	BraNPR3.A02	21627986-21629903	+	585	65785.5	6.5	50.69	Chloroplasts
B. rapa	BraA06g042710.3C	BraNPR3.A06	27963987-27965976	-	583	65305.9	6.32	48.67	Nuclear
B. rapa	BraA01g010960.3C	BraNPR4.A01	5679002-5680991	-	588	66170.4	6.04	45.96	Cytoplasm
Average					604.935	67841.4	5.93097	46.9813
