# Supplementary material
Source: Research Square preprint supplement (doi:10.21203/rs.3.rs-9782189/v1)
Supplement: Supplementary file 4 [file be71186de2d1eb9401539719.xlsx]

## Sheet: Sheet1
Table S3. Ka/Ks values of Brassica ssp. NPR pairs
Seq_1	Seq_2	Ka	Ks	Ka_Ks	Selection_pressure	Duplicate
AtNPR1	BnaNPR1.A09	0.139458	0.515031	0.270776	Purifying	Segmental
AtNPR1	BnaNPR1.C09	0.143406	0.483957	0.296319	Purifying	Segmental
AtNPR4	BnaNPR3.A02	0.1506	1.01519	0.148346	Purifying	Segmental
AtNPR4	BnaNPR4.A01	0.0976144	0.764337	0.127711	Purifying	Segmental
AtNPR4	BnaNPR4.C01	0.0958263	0.746448	0.128376	Purifying	Segmental
AtNPR2	BnaNPR1.C08	0.254291	0.694879	0.365951	Purifying	Segmental
AtNPR3	BnaNPR3.A02	0.0830069	0.505437	0.164228	Purifying	Segmental
AtNPR3	BnaNPR3.C02	0.113649	0.526166	0.215995	Purifying	Segmental
AtNPR3	BnaNPR3.C07	0.0642103	0.503548	0.127516	Purifying	Segmental
AtNPR3	BnaNPR4.A01	0.168282	1.27743	0.131735	Purifying	Segmental
AtNPR3	BnaNPR4.C01	0.164506	1.30662	0.125902	Purifying	Segmental
BolNPR4.C01	BnaNPR3.A02	0.163429	1.05132	0.155452	Purifying	Segmental
BolNPR4.C01	BnaNPR4.A01	0.00818055	0.104791	0.0780654	Purifying	Segmental
BolNPR4.C01	BnaNPR4.C01	0	0.00984024	0	Purifying	Segmental
BolNPR1.C01	BnaNPR1.A01	0.02292	0.0994486	0.230471	Purifying	Segmental
BolNPR1.C01	BnaNPR1.C01	0.00636001	0.00915026	0.695064	Purifying	Segmental
BolNPR1.C01	BnaNPR1.C08	0.145645	0.431086	0.337857	Purifying	Segmental
BolNPR3.C02	BnaNPR3.A02	0.0548357	0.0986971	0.555596	Purifying	Segmental
BolNPR3.C02	BnaNPR3.C02	0.0141944	0.0165023	0.860146	Purifying	Segmental
BolNPR3.C02	BnaNPR4.A01	0.224933	1.25796	0.178809	Purifying	Segmental
BolNPR3.C07	BnaNPR3.A02	0.0444061	0.312825	0.141952	Purifying	Segmental
BolNPR3.C07	BnaNPR3.C07	0.00648477	0.0681048	0.0952175	Purifying	Segmental
BolNPR3.C07	BnaNPR4.A01	0.153328	1.05104	0.145882	Purifying	Segmental
BolNPR1.C08	BnaNPR1.A01	0.164813	0.44846	0.36751	Purifying	Segmental
BolNPR1.C08	BnaNPR1.A08	0.0374269	0.0997427	0.375234	Purifying	Segmental
BolNPR1.C08	BnaNPR1.C01	0.176032	0.516977	0.340502	Purifying	Segmental
BolNPR1.C08	BnaNPR1.C08	0.0274815	0.0594248	0.462458	Purifying	Segmental
BolNPR1.C09	BnaNPR1.A09	0.0140246	0.0713308	0.196613	Purifying	Segmental
BolNPR1.C09	BnaNPR1.C09	0	0	NaN	Purifying	Segmental
BraNPR4.A01	BnaNPR3.A02	0.169846	0.935727	0.181512	Purifying	Segmental
BraNPR4.A01	BnaNPR4.A01	0.00519097	0.08496	0.061099	Purifying	Segmental
BraNPR4.A01	BnaNPR4.C01	0.0119346	0.153901	0.0775473	Purifying	Segmental
BraNPR1.A01	BnaNPR1.A01	0.0182855	0.0585415	0.312351	Purifying	Segmental
BraNPR1.A01	BnaNPR1.C01	0.0140684	0.0912272	0.154213	Purifying	Segmental
BraNPR1.A01	BnaNPR1.C08	0.146649	0.421488	0.347933	Purifying	Segmental
BraNPR3.A02	BnaNPR3.A02	0.00935867	0.0362374	0.25826	Purifying	Segmental
BraNPR3.A02	BnaNPR4.A01	0.166784	1.0623	0.157003	Purifying	Segmental
BraNPR3.A02	BnaNPR4.C01	0.164275	1.09009	0.150698	Purifying	Segmental
BraNPR3.A06	BnaNPR3.A02	0.0432094	0.311007	0.138934	Purifying	Segmental
BraNPR3.A06	BnaNPR3.C07	0.00890458	0.118444	0.0751794	Purifying	Segmental
BraNPR3.A06	BnaNPR4.A01	0.154572	1.12021	0.137985	Purifying	Segmental
BraNPR3.A06	BnaNPR4.C01	0.153693	1.1093	0.13855	Purifying	Segmental
BraNPR1.A08	BnaNPR1.A01	0.16546	0.425263	0.389076	Purifying	Segmental
BraNPR1.A08	BnaNPR1.C01	0.174125	0.46922	0.371096	Purifying	Segmental
BraNPR1.A08	BnaNPR1.C08	0.0277739	0.107791	0.257664	Purifying	Segmental
BraNPR1.A09	BnaNPR1.A09	0.006208	0.0221146	0.280719	Purifying	Segmental
BraNPR1.A09	BnaNPR1.C09	0.0139955	0.0739452	0.189268	Purifying	Segmental
BraNPR1.A01	BraNPR1.A08	0.158966	0.421022	0.377571	Purifying	Segmental
BraNPR4.A01	BraNPR3.A02	0.169926	0.952808	0.178342	Purifying	Segmental
BraNPR3.A02	BraNPR3.A06	0.0406525	0.306635	0.132576	Purifying	Segmental
BraNPR4.A01	BraNPR3.A06	0.156769	1.04983	0.149329	Purifying	Segmental
BolNPR1.C01	BolNPR1.C08	0.157357	0.44084	0.356948	Purifying	Segmental
BolNPR4.C01	BolNPR3.C02	0.220537	1.24672	0.176893	Purifying	Segmental
BolNPR3.C02	BolNPR3.C07	0.0591773	0.353867	0.167231	Purifying	Segmental
BolNPR4.C01	BolNPR3.C07	0.152356	1.02484	0.148663	Purifying	Segmental
BnaNPR1.A01	BnaNPR1.A08	0.16015	0.438529	0.365199	Purifying	Segmental
BnaNPR1.A01	BnaNPR1.C01	0.0306647	0.103317	0.296801	Purifying	Segmental
BnaNPR1.A01	BnaNPR1.C08	0.156801	0.446126	0.351473	Purifying	Segmental
BnaNPR1.A08	BnaNPR1.C08	0.0431564	0.107355	0.401997	Purifying	Segmental
BnaNPR1.A09	BnaNPR1.C09	0.0140246	0.0713308	0.196613	Purifying	Segmental
BnaNPR1.C01	BnaNPR1.C08	0.154322	0.446297	0.345783	Purifying	Segmental
BnaNPR4.A01	BnaNPR3.A02	0.166577	1.05814	0.157424	Purifying	Segmental
BnaNPR3.A02	BnaNPR3.C02	0.0677455	0.120707	0.561239	Purifying	Segmental
BnaNPR4.A01	BnaNPR4.C01	0.00818258	0.11602	0.0705271	Purifying	Segmental
