# Supplementary material
Source: Research Square preprint supplement (doi:10.21203/rs.3.rs-9782189/v1)
Supplement: Supplementary file 5 [file fe81757c3c3eaa9fbf2bb59f.xlsx]

## Sheet: Sheet1
Table S1. Primers used for analysis
Gene	Primer-F (5'-3')	Primer-R (5'-3')	Description
BnaNPR1.A01	GAATGCGCAGACGAGAGTT	CAGATGTTAGCGAGCTTGAGGA	qRT-PCR
BnaNPR1.A08	GTACGTTTACAGCGGCAGAGT	CTTGGCCACAGATGTTGGCAA
BnaNPR1.A09	GCTTCATGTTGCCGCCAT	TCTTGAGTTCATGGTCCGCCA
BnaNPR1.C01	GTACGTTTACAGCGGCAGAGT	CCGCAGATGTTAGCAAGCTTGA
BnaNPR1.C08	GAGATTCCGGAGTTGGTTACAAT	CCATATCCGACGCATTTGCA
BnaNPR2.A01	GTACGTATACAGCGGCAGAGT	CTTCTTGTATGTCTCACCACAGA
BnaNPR2.C01	CTAAAGGAGATCGCGAGAGAT	CTTCACCACAGATGTTAGCGA
BnaNPR3.A02	GCCTCTAACCTCGAAGTGAT	CTTCATGCCCAACAACAGGCAA
BnaNPR3.C02	GTCCGTACAAGAGAAAAACCCT	CACTTGGAGGTTAGAAGCTGA
BnaNPR3.C07	GATCTCGTCGTTGAGTTGATGT	CGATACAGAACCTGTAGAGATCTGA
BnaNPR4.A01	GTTGATACCGGCTGCGTTCAT	CTTCAAGAGGAAGCTCCTTCTCTA
BnaNPR4.C01	GGCTGCGCTCATGACTCTT	CTAGCTCCACATCGTCTGAATCCA
BnaActin	GACAATGGAACTGGAATGGT	CAGATCTTCTCCATGTCATCCCA
AtActin7	GGAGCTGAGAGATTCCGTTG	GGTGCAACCACCTTGATCTT
PbActin	CACCGACTACCTGATGAA	CAGCTTCTCCTTGATGTC
AtNPR3.A02	TCGAAGTAGTGATTGTGCATCTATGAACACCAACGTTTTAGAGCTAGAAATAGC	TTCTAGCTCTAAAACTTGGAGGTTTCGACTTGTGCAATCTCTTAGTCGACTCTAC	Gene Knockout
AtNPR3.A02_JD	GTTAGTCTAACCAAACTCAGCT	CTAGCTCAGGCACTTGGAGAA
1300_JD	ACTATCCTTCGCAAGACCCTTCCTC	TTGTGCCCATTAACATCACCATCTA	Gene Over-expression
BnaBGLU27.C08-OE	ATGGTTCGAAAACAGAGCT	TGCTGAGTTCTCCAGACCA
